# Supplementary material
Source: PubMed Central journal article supplement (PMC11028512)
Supplement: 262_2015_1735_MOESM1_ESM.pdf [file 262_2015_1735_MOESM1_ESM.pdf]

| patient | gender | age | tumor size (cm) | Fuhrmann Grade | TNM       | metastasis                       | performance status | MSKCC criteria | HLA-Type | sunitinib pre-treatment | TIL expansion | Tumor cell line |
|---------|--------|-----|-----------------|----------------|-----------|----------------------------------|--------------------|----------------|----------|-------------------------|---------------|-----------------|
| n1      | M      | 59  | 14              | 4              | pT4N2M1   | LN, liver, lung                  | WHO 0              | intermediate   | A2       | -                       | yes           | yes             |
| n2      | M      | 53  | 9               | 2              | pT2aNxMx  | -                                | WHO 0              | intermediate   | -        | -                       | no            | no              |
| n3      | M      | 60  | 11,5            | 1              | cT3cN1M1  | LN, lung                         | WHO 1              | unfavorable    | -        | -                       | no            | no              |
| n4      | M      | 40  | 7               | 4              | pT3aN2M1  | LN, bone, lung, adrenal gland    | WHO 1              | intermediate   | A2/A3    | -                       | yes           | yes             |
| n5      | M      | 49  | 4               | 3              | pT1aNxMx  | -                                | WHO 0              | intermediate   | -        | -                       | no            | no              |
| n6      | F      | 49  | 10              | 2              | pT3bN0M0  | -                                | WHO 0              | n.a.           | A2/A3    | -                       | yes           | yes             |
| n7      | M      | 65  | 5               | 1              | pT1bcNxMx | possible lung and mediastinal LN | WHO 0              | n.a.           | -        | -                       | no            | no              |
| n8      | F      | 64  | 4,5             | 1              | pT1N0M0   | -                                | WHO 0              | n.a.           | A1/A3    | -                       | yes           | yes             |
| n9      | F      | 60  | 19              | 4              | pT3bN2M0  | LN                               | WHO 1              | unfavorable    | A11      | -                       | yes           | yes             |
| n10     | M      | 65  | 8               | 2              | pT3aN0M0  | para-aortic and lung             | WHO 1              | intermediate   | A2       | -                       | yes           | yes             |
| n11     | F      | 78  | 8               | 2              | pT3aN1M0  | -                                | WHO 0              | n.a.           | A1/A3    | -                       | yes           | no              |
| n12     | F      | 64  | 9               | 1              | pT3bN0M0  | -                                | WHO 0              | n.a.           | A1       | -                       | yes           | yes             |
| n13     | F      | 67  | 6               | 2              | pT1pN0cM0 | -                                | WHO 0              | n.a.           | A2       | -                       | yes           | yes             |
| n14     | M      | 54  | 11              | 4              | pT2N0M0   | -                                | WHO 1              | n.a.           | A2       | -                       | yes           | no              |
| n15     | M      | 55  | 9               | 2              | pT2N0M1   | lung, pleura                     | WHO 1              | intermediate   | A11      | -                       | yes           | yes             |
| n16     | F      | 62  | 8               | 3              | pT4N2M1   | LN, lung, muscle                 | WHO 1              | unfavorable    | A1/A11   | -                       | yes           | yes             |
| n17     | M      | 70  | 13              | 4              | pT3cN2M1  | LN                               | WHO 0              | intermediate   | A1       | -                       | yes           | yes             |
| s1      | F      | 72  | 8               | 3              | pT4N0M0   | -                                | WHO 0              | n.a.           | A2       | 2 cycles suted          | yes           | yes             |
| s2      | M      | 44  | 2,3             | 2              | pT2N1M1   | skeletal                         | WHO 2              | unfavorable    | A1       | 2 cycles suted          | yes           | yes             |
| s3      | F      | 52  | 8               | 4              | cT3pN2M1  | LN, liver, skeletal              | WHO 0              | intermediate   | A2       | 2 cycles suted          | yes           | yes             |
| s4      | M      | 64  | 2,5             | 1              | pT1N0M1   | skeletal                         | WHO 1              | intermediate   | A2/A3/B7 | 3 cycles suted          | yes           | yes             |
| s5      | M      | 66  | 6               | 3              | T1bN0M1   | lung                             | WHO 0              | intermediate   | A1/A2    | 3 cycles suted          | yes           | yes             |
| s6      | M      | 50  | 3,7             | 3              | pT1aN0M1  | lung, skeletal                   | WHO 1              | intermediate   | A11      | 2 cycles suted          | yes           | yes             |
| s7      | M      | 49  | 7               | 3              | pT3aN2M1  | LN, liver, skeletal              | WHO 0              | favorable      | A1/A2    | 2 cycles suted          | yes           | yes             |
| s8      | F      | 57  | 10              | 3              | pT2N2M1   | LN, lung                         | WHO 1              | intermediate   | A2       | 3 cycles suted          | yes           | yes             |
| s9      | M      | 65  | 19              | 4              | pT3aN2M1  | LN, pleura, thyroid              | WHO1               | unfavorable    | A2/A11   | 3 cycles suted          | yes           | yes             |
| s10     | F      | 60  | 7               | 4              | pT1N2M1   | LN, lung, liver                  | WHO 2              | unfavorable    | A2       | 3 cycles suted          | yes           | yes             |
| s11     | V      | 71  | 6               | ?              | cT2cN1M1  | LN, lung                         | WHO 2              | unfavorable    | -        | 4 cycles suted          | no            | no              |
| s12     | M      | 70  | 8               | 2              | pT3bNxM1  | lung, adrenal gland              | WHO 0              | intermediate   | A11      | 3 cycles suted          | yes           | yes             |
| s13     | M      | 43  | 4               | 2              | cT1bcNxM1 | skeletal,adrenal gland           | WHO 1              | intermediate   | -        | 3 cycles suted          | no            | no              |

**Supplemental Table 1: Patient characteristics in detail**

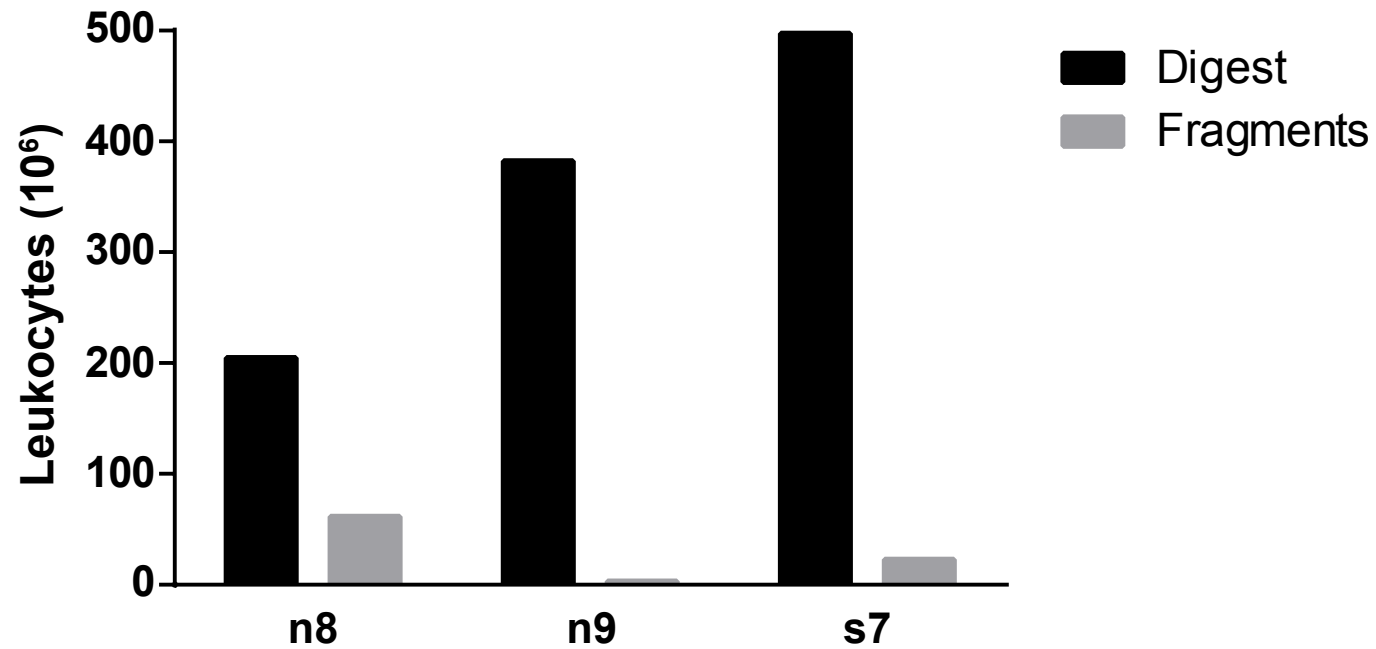

**Supplemental Figure 1: Tumor digestion leads to a superior fold expansion as compared to TIL outgrowth from tumor fragments.** RCC tissues samples from three different patients (n8, n9 and s7) were split in half and either fragmented (cut into smaller pieces aiming at a size of 1 mm<sup>3</sup>, to obtain each 12 fragments that were placed individually into 24 well plates) or digested as described in the materials & methods section. After 25 days of TIL culture the number of expanded leucocytes was determined individually.
